# Supplementary material for: Response of Fibroblasts from Menkes’ and Wilson’s Copper Metabolism-Related Disorders to Ionizing Radiation: Influence of the Nucleo-Shuttling of the ATM Protein Kinase
Source: MDPI journal article supplement (doi:10.3390/biom13121746), 2023-12-05

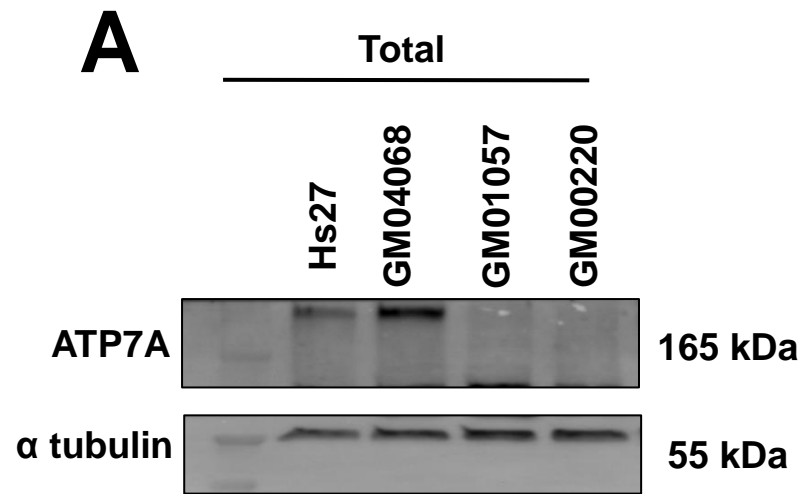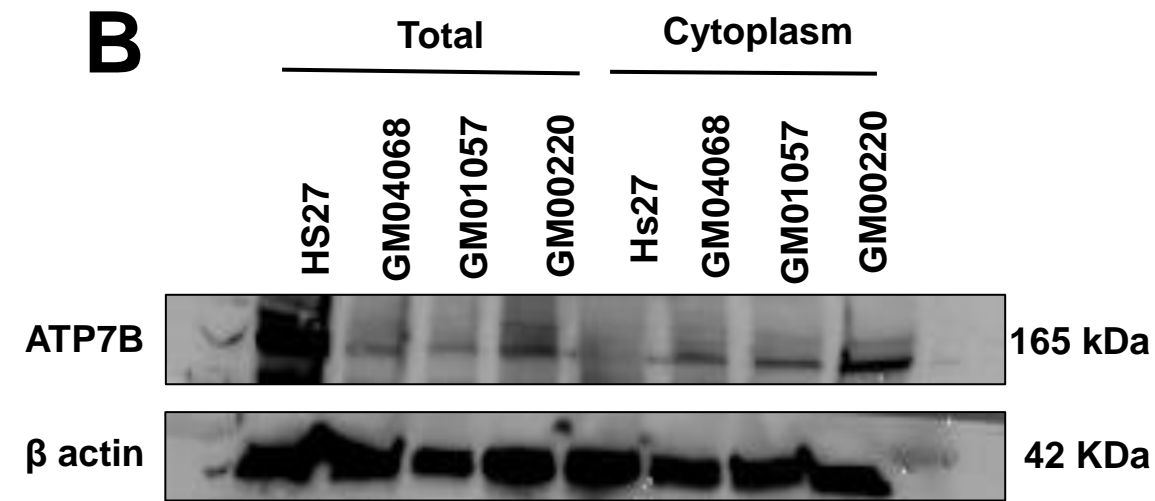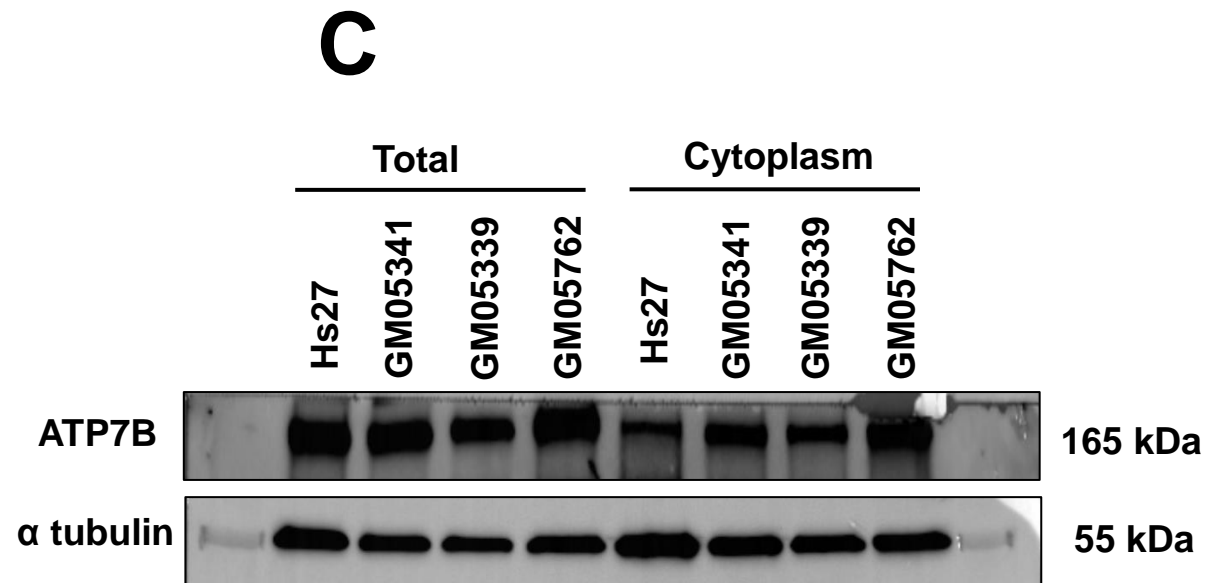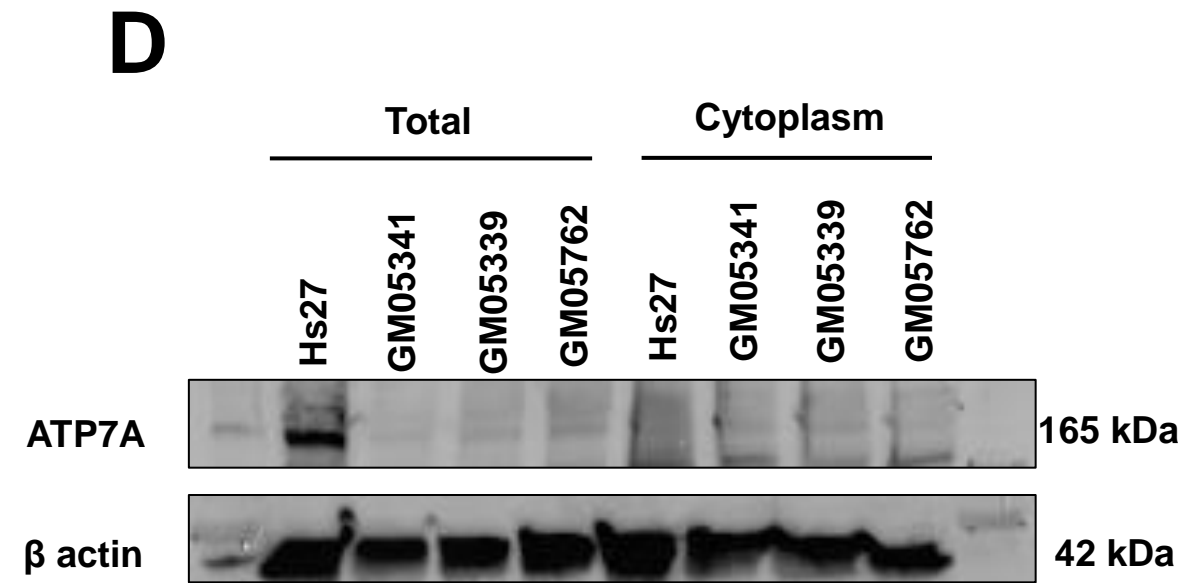

Replicat : 1  
Cellule : Wilson  
Condition: NT  
Manip: totale/Cyto-Nuc  
Gel: 25/02/2021  
Révélation: 26/02/2021

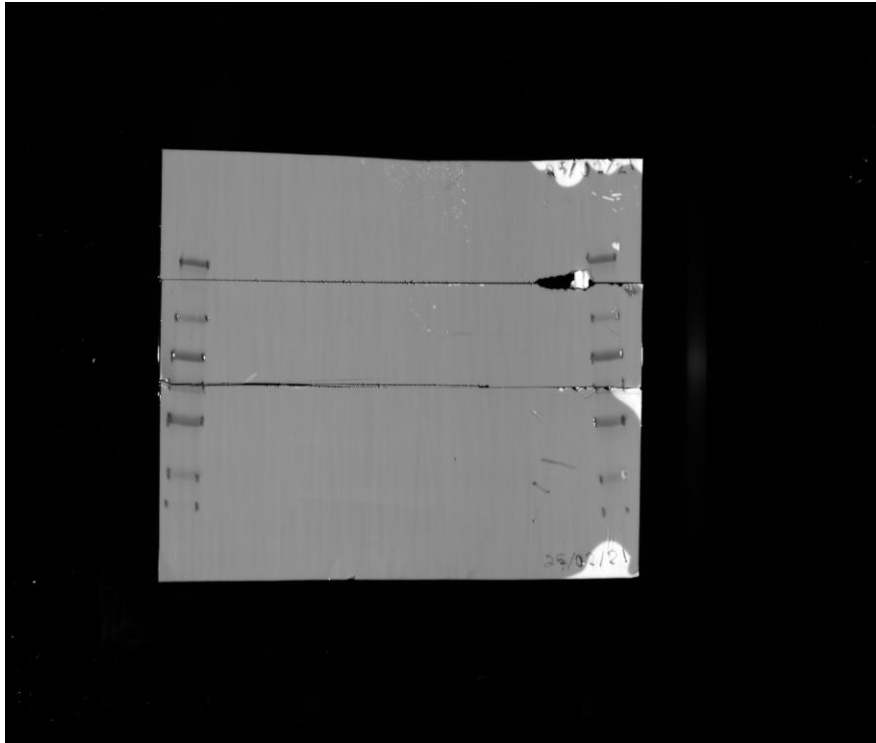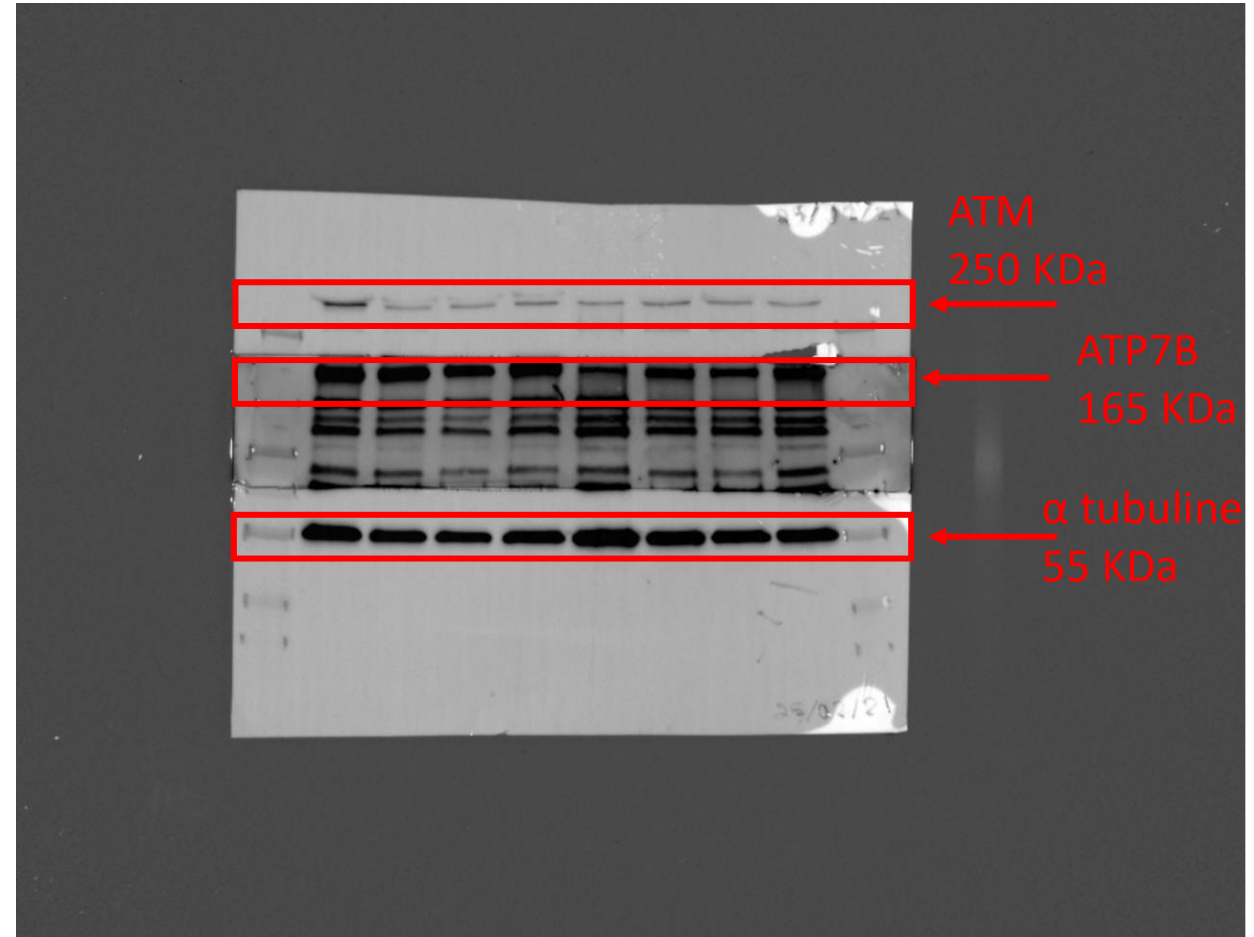

Replicat : 4

Cellule : Menkes

Condition: NT

Manip: total

Gel: 07/05/2021

Révélation: 12/05/2021

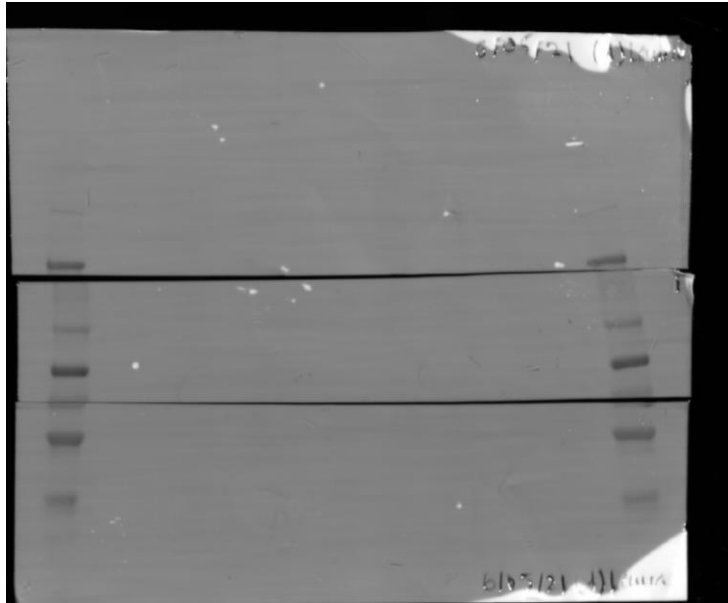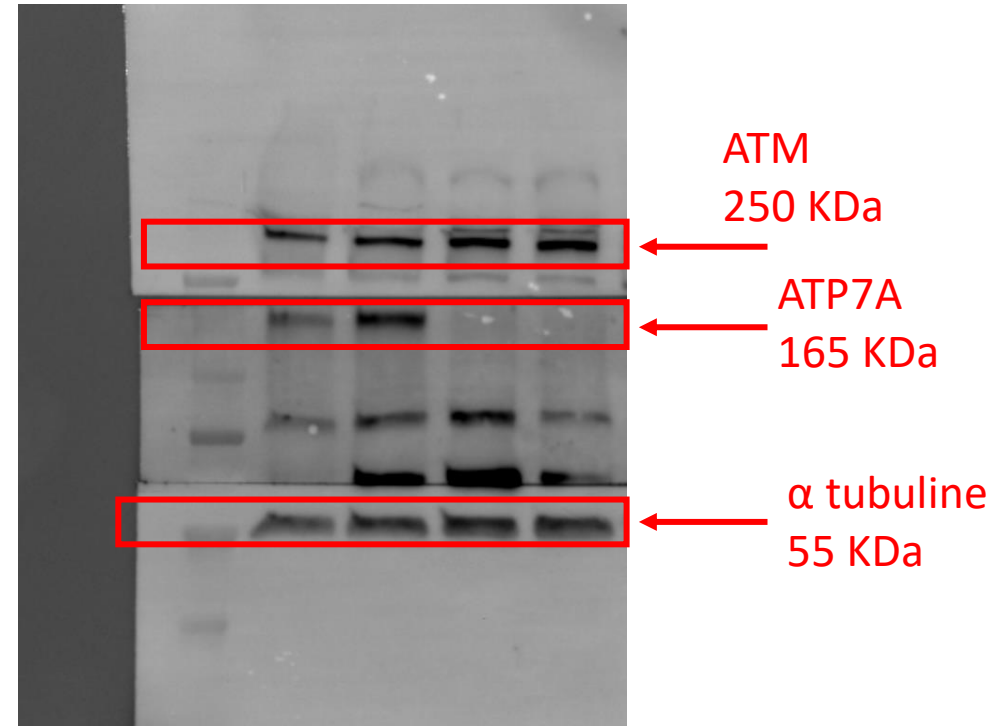

Replicat : 3  
Cellules : Wilson & Menkes  
Condition: NT  
Manip: total/ Cytoplasm  
Gel: 23/08/2023  
Révélation:24/08/2023

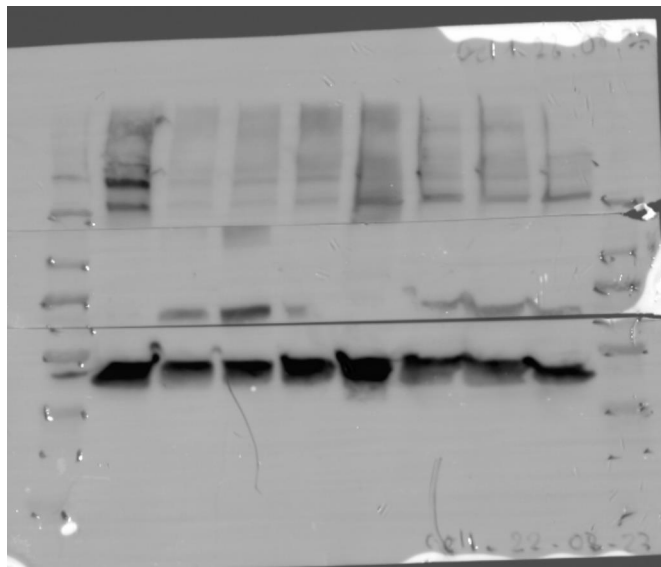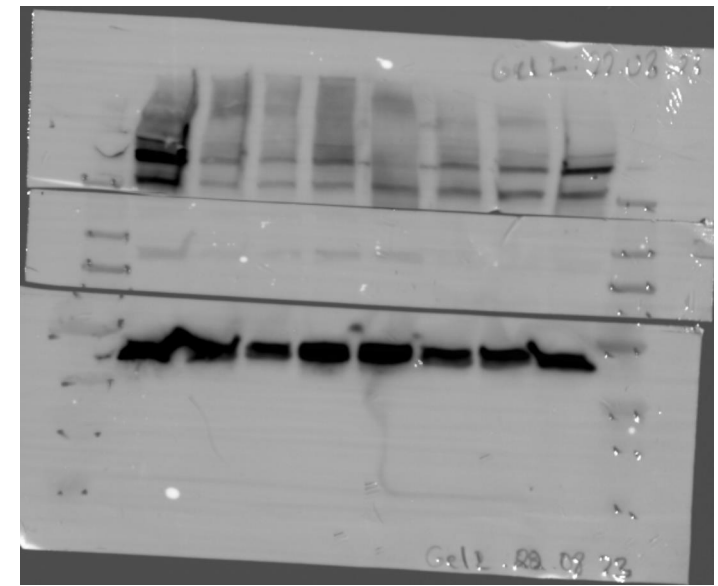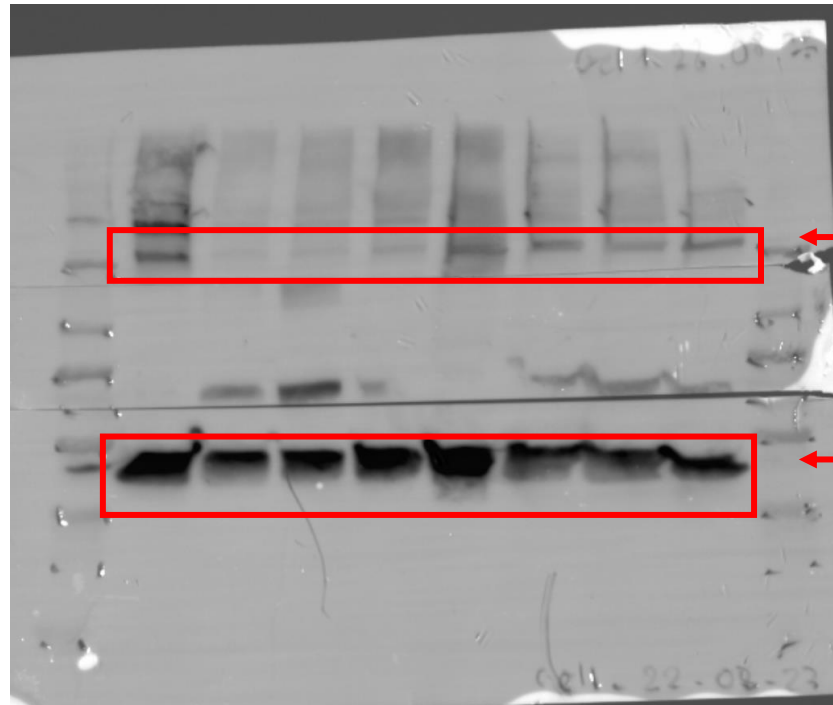

ATP7A  
165 KDa

$\beta$  actine  
42 KDa

ATP7B  
165 KDa

$\beta$  actine  
42 KDa

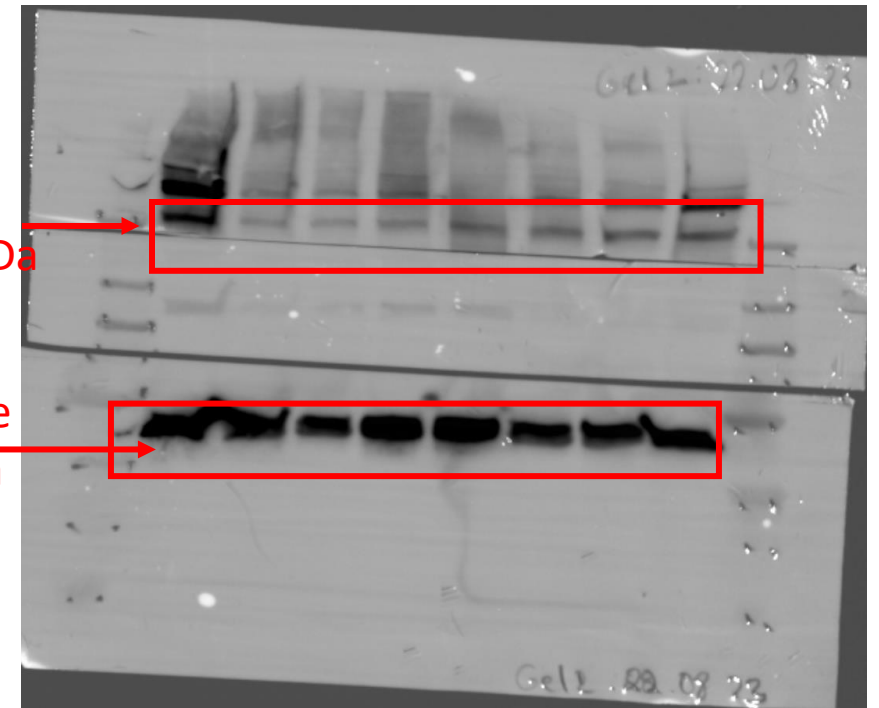

Supplement: s1 [file s1]
